# Supplementary material for: Lipidomics as a tool of predicting progression from non-alcoholic fatty pancreas disease to type 2 diabetes mellitus
Source: Royal Society of Chemistry journal article supplement (doi:10.1039/c9ra07071k), 2019-01-01
Supplement: c9ra07071k1.pdf [file c9ra07071k1.pdf]

Table S1 Comparison of PE subtypes in each group

|               | NC group     | NDM group                 | DM group                  |
|---------------|--------------|---------------------------|---------------------------|
| pPE (nmol/mL) | 184.44±13.45 | 170.05±13.04 <sup>Δ</sup> | 170.16±13.44 <sup>Δ</sup> |
| aPE (nmol/mL) | 11.62±0.9    | 9.24±0.72 <sup>Δ</sup>    | 8.26±0.64 <sup>ΔΔ</sup>   |
| dPE (nmol/mL) | 106.00±12.04 | 120.22 ±15.95             | 120.17±16.88              |

Compared with NC group, <sup>Δ</sup>*P*<0.05, <sup>ΔΔ</sup>*P*<0.01; Compared with NDM group, \**P*<0.05, \*\**P*<0.01

Table S2 Comparison of PC subtypes in each group

|               | NC group        | NDM group       | DM group        |
|---------------|-----------------|-----------------|-----------------|
| pPC (nmol/mL) | 108.85 ± 4.08   | 105.07 ± 3.94   | 104.51 ± 3.66   |
| aPC (nmol/mL) | 49.42 ± 8.82    | 47.62 ± 1.80    | 46.96 ± 8.77    |
| dPC (nmol/mL) | 1713.05 ± 48.22 | 1746.40 ± 60.82 | 1849.06 ± 70.30 |

Compared with NC group, <sup>Δ</sup>*P*<0.05, <sup>ΔΔ</sup>*P*<0.01; Compared with NDM group, \**P*<0.05, \*\**P*<0.01

Table S3 Comparison of 4-HNE subtypes in each group

|                | NC group    | NDM group   | DM group                  |
|----------------|-------------|-------------|---------------------------|
| HHE (nmol/mL)  | 0.72 ± 0.08 | 0.85 ± 0.08 | 1.03 ± 0.08 <sup>ΔΔ</sup> |
| HNDE (nmol/mL) | 0.06 ± 0.01 | 0.08 ± 0.02 | 0.13 ± 0.04 <sup>Δ</sup>  |
| HNE (nmol/mL)  | 0.74 ± 0.09 | 0.80 ± 0.10 | 0.90 ± 0.15               |
| TOTAL          | 1.52 ± 0.13 | 1.73 ± 0.14 | 2.06 ± 0.21 <sup>Δ</sup>  |

Note: Compared with NC group <sup>Δ</sup>*P*<0.05, <sup>ΔΔ</sup>*P*<0.01; Compared with Non-DM group, \**P*<0.05, \*\**P*<0.01

**Table S4 Internal standard concentration of various lipids in internal standard mixture**

| <b>species</b>             | <b>Monoisotopic mass</b> | <b>Concentration (nmol/mL plasma)</b> |
|----------------------------|--------------------------|---------------------------------------|
| D14:1 PC                   | 673.91                   | 226.95                                |
| D16:1 PE                   | 687.91                   | 24.09                                 |
| D15:0 PG (Na)              | 716.9                    | 11.16                                 |
| 14:0 LPE                   | 425.5                    | 6.48                                  |
| 17:0 LPC                   | 509.66                   | 81.02                                 |
| N12:0 SPhingomyelin        | 646.93                   | 53.92                                 |
| N17:0 Ceramide             | 551.94                   | 2.43                                  |
| D14:0 PS (Na)              | 701.85                   | 4.50                                  |
| d7-Cholesterol             | 393.70                   | 4.13                                  |
| T17:1 TAG                  | 843.37                   | 323.71                                |
| <sup>13</sup> C4 Carnitine | 440.04                   | 0.10                                  |
| 1,3-D15:0 DAG              | 541.04                   | 20.04                                 |
| 17:1 MAG                   | 342.50                   | 20.09                                 |
| d4-16:0 FFA                | 260.40                   | 215.85                                |
| T14:0 CardioliPin          | 1275.71                  | 5.99                                  |
| D14:0 PA(Na)               | 614.78                   | 0.41                                  |
| d3-4-HNE                   | 156.22                   | 10.47                                 |
